# Supplementary material for: In Vitro Activity of Eravacycline against Gram-Negative Bacilli Isolated in Clinical Laboratories Worldwide from 2013 to 2017
Source: PubMed Central journal article supplement (PMC7038303; doi:10.1128/aac.01699-19), 2020-02-21
Supplement: AAC.01699-19-s0001.pdf [file AAC.01699-19-s0001.pdf]

**SUPPLEMENTAL TABLE 1** *In vitro* activity of eravacycline and selected comparator agents against Gram-negative bacilli stratified by geographic region, cumulative 2013-2017 data

| Isolates                      | Geographic region         | µg/ml                 |                   |                   |                   |                   |                   |                   |                       |                   |                   |                       |                   |                   |
|-------------------------------|---------------------------|-----------------------|-------------------|-------------------|-------------------|-------------------|-------------------|-------------------|-----------------------|-------------------|-------------------|-----------------------|-------------------|-------------------|
|                               |                           | <i>n</i> <sup>a</sup> | Eravacycline      |                   | Tigecycline       |                   | Tetracycline      |                   | Minocycline           |                   |                   | Meropenem             |                   |                   |
|                               |                           |                       | MIC <sub>50</sub> | MIC <sub>90</sub> | MIC <sub>50</sub> | MIC <sub>90</sub> | MIC <sub>50</sub> | MIC <sub>90</sub> | <i>n</i> <sup>b</sup> | MIC <sub>50</sub> | MIC <sub>90</sub> | <i>n</i> <sup>b</sup> | MIC <sub>50</sub> | MIC <sub>90</sub> |
| <i>All Enterobacteriaceae</i> | Asia/Pacific <sup>c</sup> | 1629                  | 0.25              | 0.5               | 0.5               | 1                 | 2                 | >8                | 1004                  | 2                 | 16                | 1629                  | 0.03              | 0.12              |
|                               | Europe                    | 3933                  | 0.25              | 0.5               | 0.5               | 1                 | 2                 | >8                | 1942                  | 2                 | 8                 | 2887                  | 0.03              | 0.12              |
|                               | North America             | 4969                  | 0.25              | 0.5               | 0.5               | 1                 | 2                 | >8                | 2113                  | 2                 | 8                 | 3018                  | 0.03              | 0.06              |
| <i>Klebsiella</i> spp.        | Asia/Pacific <sup>c</sup> | 796                   | 0.25              | 0.5               | 0.5               | 1                 | 1                 | >8                | 471                   | 2                 | 16                | 796                   | 0.03              | 0.06              |
|                               | Europe                    | 1694                  | 0.25              | 0.5               | 0.5               | 2                 | 2                 | >8                | 812                   | 2                 | 16                | 1,247                 | 0.03              | 0.12              |
|                               | North America             | 2475                  | 0.25              | 0.5               | 0.5               | 2                 | 2                 | >8                | 1,041                 | 2                 | 8                 | 1,429                 | 0.03              | 0.06              |
| <i>Enterobacter</i> spp.      | Asia/Pacific <sup>c</sup> | 203                   | 0.25              | 1                 | 0.5               | 2                 | 2                 | >8                | 146                   | 4                 | 8                 | 203                   | 0.06              | 0.25              |
|                               | Europe                    | 770                   | 0.5               | 1                 | 0.5               | 2                 | 2                 | >8                | 415                   | 4                 | 8                 | 622                   | 0.06              | 0.12              |
|                               | North America             | 847                   | 0.5               | 0.5               | 0.5               | 1                 | 2                 | 8                 | 319                   | 2                 | 8                 | 497                   | 0.03              | 0.12              |
| <i>Citrobacter</i> spp.       | Asia/Pacific <sup>c</sup> | 317                   | 0.12              | 0.5               | 0.5               | 1                 | 1                 | >8                | 218                   | 2                 | 8                 | 317                   | 0.03              | 0.06              |
|                               | Europe                    | 788                   | 0.25              | 0.5               | 0.5               | 1                 | 1                 | 4                 | 326                   | 1                 | 4                 | 490                   | 0.03              | 0.06              |
|                               | North America             | 671                   | 0.25              | 0.5               | 0.5               | 1                 | 1                 | 8                 | 337                   | 2                 | 8                 | 465                   | 0.03              | 0.06              |
| <i>E. coli</i>                | Asia/Pacific <sup>c</sup> | 313                   | 0.12              | 0.25              | 0.25              | 0.5               | 4                 | >8                | 169                   | 2                 | 8                 | 313                   | 0.03              | 0.03              |
|                               | Europe                    | 681                   | 0.12              | 0.25              | 0.25              | 0.5               | 2                 | >8                | 389                   | 1                 | 16                | 528                   | 0.03              | 0.03              |
|                               | North America             | 976                   | 0.12              | 0.25              | 0.25              | 1                 | 2                 | >8                | 416                   | 1                 | 16                | 627                   | 0.03              | 0.03              |
| <i>P. mirabilis</i>           | Asia/Pacific <sup>c</sup> | 95                    | 1                 | 2                 | 4                 | 8                 | >8                | >8                | 70                    | 16                | >16               | 95                    | 0.06              | 0.12              |
|                               | Europe                    | 705                   | 2                 | 2                 | 4                 | 8                 | >8                | >8                | 383                   | 16                | >16               | 555                   | 0.06              | 0.12              |
|                               | North America             | 548                   | 1                 | 2                 | 4                 | 8                 | >8                | >8                | 178                   | 16                | >16               | 290                   | 0.06              | 0.12              |
| <i>S. marcescens</i>          | Asia/Pacific <sup>c</sup> | 45                    | 1                 | 1                 | 2                 | 2                 | >8                | >8                | 19                    | 4                 | 4                 | 45                    | 0.06              | 0.06              |
|                               | Europe                    | 349                   | 1                 | 2                 | 2                 | 2                 | >8                | >8                | 87                    | 4                 | 8                 | 199                   | 0.06              | 0.12              |
|                               | North America             | 554                   | 1                 | 2                 | 2                 | 2                 | >8                | >8                | 123                   | 4                 | 8                 | 207                   | 0.06              | 0.12              |
| <i>A. baumannii</i>           | Asia/Pacific <sup>c</sup> | 287                   | 0.5               | 1                 | 2                 | 4                 | >8                | >8                | 287                   | 1                 | 16                | 287                   | 64                | >64               |
|                               | Europe                    | 849                   | 0.5               | 1                 | 2                 | 8                 | >8                | >8                | 699                   | 4                 | 16                | 699                   | 64                | >64               |
|                               | North America             | 961                   | 0.5               | 1                 | 2                 | 4                 | >8                | >8                | 612                   | 1                 | 8                 | 612                   | 4                 | >64               |
| <i>S. maltophilia</i>         | Asia/Pacific <sup>c</sup> | 244                   | 1                 | 2                 | 2                 | 4                 | >8                | >8                | 244                   | 0.5               | 2                 | 244                   | >64               | >64               |

|                               |                           |     |      |      |      |     |    |    |     |     |     |     |      |      |
|-------------------------------|---------------------------|-----|------|------|------|-----|----|----|-----|-----|-----|-----|------|------|
|                               | Europe                    | 623 | 1    | 2    | 2    | 4   | >8 | >8 | 524 | 0.5 | 2   | 524 | >64  | >64  |
|                               | North America             | 343 | 1    | 2    | 2    | 4   | >8 | >8 | 312 | 0.5 | 2   | 312 | >64  | >64  |
| MDR isolates <sup>d</sup>     |                           |     |      |      |      |     |    |    |     |     |     |     |      |      |
| <i>All Enterobacteriaceae</i> | Asia/Pacific <sup>c</sup> | 458 | 0.25 | 1    | 0.5  | 2   | >8 | >8 | 297 | 4   | >16 | 458 | 0.06 | 0.5  |
|                               | Europe                    | 823 | 0.5  | 1    | 1    | 2   | >8 | >8 | 430 | 4   | >16 | 643 | 0.06 | 2    |
|                               | North America             | 770 | 0.25 | 1    | 0.5  | 2   | >8 | >8 | 385 | 4   | >16 | 555 | 0.03 | 1    |
| <i>Klebsiella</i> spp.        | Asia/Pacific <sup>c</sup> | 192 | 0.25 | 1    | 1    | 4   | >8 | >8 | 122 | 4   | >16 | 192 | 0.06 | >4   |
|                               | Europe                    | 350 | 0.5  | 2    | 1    | 2   | 8  | >8 | 185 | 8   | >16 | 263 | 0.06 | >4   |
|                               | North America             | 259 | 0.5  | 2    | 1    | 4   | 4  | >8 | 131 | 4   | >16 | 171 | 0.06 | >4   |
| <i>Enterobacter</i> spp.      | Asia/Pacific <sup>c</sup> | 69  | 0.5  | 2    | 1    | 4   | 4  | >8 | 47  | 4   | >16 | 69  | 0.12 | 0.5  |
|                               | Europe                    | 214 | 0.5  | 2    | 1    | 4   | >8 | >8 | 116 | 4   | >16 | 181 | 0.12 | 0.5  |
|                               | North America             | 165 | 0.5  | 2    | 1    | 4   | 4  | >8 | 64  | 4   | >16 | 114 | 0.06 | 0.25 |
| <i>Citrobacter</i> spp.       | Asia/Pacific <sup>c</sup> | 69  | 0.25 | 1    | 0.5  | 2   | 4  | >8 | 46  | 4   | >16 | 69  | 0.06 | 1    |
|                               | Europe                    | 87  | 0.5  | 1    | 0.5  | 2   | 2  | >8 | 40  | 4   | >16 | 69  | 0.06 | 0.25 |
|                               | North America             | 91  | 0.25 | 2    | 1    | 2   | 8  | >8 | 53  | 8   | >16 | 72  | 0.06 | 4    |
| <i>E. coli</i>                | Asia/Pacific <sup>c</sup> | 128 | 0.12 | 0.25 | 0.25 | 0.5 | >8 | >8 | 82  | 2   | 16  | 128 | 0.03 | 0.06 |
|                               | Europe                    | 172 | 0.12 | 0.5  | 0.25 | 1   | >8 | >8 | 89  | 2   | >16 | 130 | 0.03 | 0.06 |
|                               | North America             | 255 | 0.25 | 0.5  | 0.5  | 1   | >8 | >8 | 137 | 2   | 16  | 198 | 0.03 | 0.06 |
| <i>P. mirabilis</i>           | Asia/Pacific <sup>c</sup> | 26  | 1    | 4    | 4    | 16  | >8 | >8 | 17  | 16  | >16 | 26  | 0.06 | 0.12 |
|                               | Europe                    | 190 | 2    | 4    | 4    | 8   | >8 | >8 | 115 | 16  | >16 | 153 | 0.06 | 0.12 |
|                               | North America             | 112 | 2    | 4    | 4    | 8   | >8 | >8 | 35  | >16 | >16 | 62  | 0.06 | 0.12 |
| <i>S. marcescens</i>          | Asia/Pacific <sup>c</sup> | 5   | --   | --   | --   | --  | -- | -- | 1   | --  | --  | 5   | --   | --   |
|                               | Europe                    | 45  | 2    | 4    | 2    | 4   | >8 | >8 | 8   | --  | --  | 28  | 0.12 | 0.25 |
|                               | North America             | 37  | 2    | 4    | 2    | 4   | >8 | >8 | 8   | --  | --  | 21  | 0.06 | >4   |
| <i>A. baumannii</i>           | Asia/Pacific <sup>c</sup> | 202 | 0.5  | 1    | 2    | 4   | >8 | >8 | 202 | 4   | 16  | 202 | 64   | >64  |
|                               | Europe                    | 695 | 0.5  | 1    | 4    | 8   | >8 | >8 | 572 | 8   | 16  | 572 | 64   | >64  |
|                               | North America             | 605 | 0.5  | 2    | 2    | 8   | >8 | >8 | 356 | 2   | 16  | 356 | 64   | >64  |

<sup>a</sup> The number of isolates tested against eravacycline, tetracycline, tigecycline, and piperacillin-tazobactam. All four of these agents were included in the study from 2013 to 2016.

<sup>b</sup> No. of organisms tested against minocycline (not tested in 2013-2014 and only tested against non-fermentative Gram-negative bacilli in 2015) and meropenem (not tested in 2013-2014).

<sup>c</sup> Isolates from the Asia/Pacific geographic region were included in the study in 2015 and 2016 only.

<sup>d</sup> MDR isolates defined using CLSI breakpoints.

**SUPPLEMENTAL TABLE 2** *In vitro* activity of eravacycline and selected comparator agents against Gram-negative bacilli stratified by specimen source, cumulative 2013-2017 data

| Isolates                      | Specimen source | <i>n</i> <sup>a</sup> | µg/ml             |                   |                   |                   |                   |                   |                       |                   |                   |                       |                   |                   |
|-------------------------------|-----------------|-----------------------|-------------------|-------------------|-------------------|-------------------|-------------------|-------------------|-----------------------|-------------------|-------------------|-----------------------|-------------------|-------------------|
|                               |                 |                       | Eravacycline      |                   | Tigecycline       |                   | Tetracycline      |                   | Minocycline           |                   |                   | Meropenem             |                   |                   |
|                               |                 |                       | MIC <sub>50</sub> | MIC <sub>90</sub> | MIC <sub>50</sub> | MIC <sub>90</sub> | MIC <sub>50</sub> | MIC <sub>90</sub> | <i>n</i> <sup>b</sup> | MIC <sub>50</sub> | MIC <sub>90</sub> | <i>n</i> <sup>b</sup> | MIC <sub>50</sub> | MIC <sub>90</sub> |
| <i>All Enterobacteriaceae</i> | Intra-abdominal | 3740                  | 0.25              | 0.5               | 0.5               | 2                 | 2                 | >8                | 1614                  | 2                 | 8                 | 2391                  | 0.03              | 0.12              |
|                               | Respiratory     | 2875                  | 0.25              | 0.5               | 0.5               | 2                 | 2                 | >8                | 1728                  | 2                 | 8                 | 2583                  | 0.03              | 0.06              |
|                               | Urinary         | 3198                  | 0.25              | 0.5               | 0.5               | 1                 | 2                 | >8                | 1716                  | 2                 | 8                 | 2559                  | 0.03              | 0.06              |
| <i>Klebsiella</i> spp.        | Intra-abdominal | 1610                  | 0.25              | 1                 | 0.5               | 2                 | 2                 | >8                | 659                   | 2                 | 8                 | 999                   | 0.03              | 0.06              |
|                               | Respiratory     | 1594                  | 0.25              | 0.5               | 0.5               | 2                 | 1                 | >8                | 943                   | 2                 | 8                 | 1,373                 | 0.03              | 0.06              |
|                               | Urinary         | 1392                  | 0.25              | 0.5               | 0.5               | 2                 | 1                 | >8                | 722                   | 2                 | 8                 | 1,100                 | 0.03              | 0.06              |
| <i>Enterobacter</i> spp.      | Intra-abdominal | 679                   | 0.5               | 1                 | 0.5               | 2                 | 2                 | >8                | 320                   | 2                 | 8                 | 493                   | 0.06              | 0.12              |
|                               | Respiratory     | 562                   | 0.5               | 0.5               | 0.5               | 2                 | 2                 | >8                | 350                   | 4                 | 8                 | 518                   | 0.03              | 0.12              |
|                               | Urinary         | 465                   | 0.5               | 1                 | 0.5               | 2                 | 2                 | >8                | 209                   | 4                 | >16               | 310                   | 0.06              | 0.12              |
| <i>Citrobacter</i> spp.       | Intra-abdominal | 581                   | 0.25              | 0.5               | 0.5               | 1                 | 1                 | >8                | 284                   | 2                 | 16                | 401                   | 0.03              | 0.06              |
|                               | Respiratory     | 392                   | 0.25              | 0.5               | 0.5               | 1                 | 1                 | 4                 | 246                   | 1                 | 8                 | 365                   | 0.03              | 0.06              |
|                               | Urinary         | 697                   | 0.25              | 0.5               | 0.5               | 1                 | 1                 | 8                 | 351                   | 1                 | 8                 | 506                   | 0.03              | 0.06              |
| <i>E. coli</i>                | Intra-abdominal | 870                   | 0.12              | 0.25              | 0.25              | 0.5               | 2                 | >8                | 351                   | 1                 | 8                 | 498                   | 0.03              | 0.03              |
|                               | Respiratory     | 327                   | 0.12              | 0.25              | 0.25              | 0.5               | 4                 | >8                | 189                   | 2                 | 16                | 327                   | 0.03              | 0.03              |
|                               | Urinary         | 644                   | 0.12              | 0.25              | 0.25              | 1                 | 2                 | >8                | 434                   | 1                 | 16                | 643                   | 0.03              | 0.03              |
| <i>P. mirabilis</i>           | Intra-abdominal | 411                   | 2                 | 2                 | 4                 | 8                 | >8                | >8                | 177                   | 16                | >16               | 273                   | 0.06              | 0.12              |
|                               | Respiratory     | 290                   | 2                 | 4                 | 4                 | 8                 | >8                | >8                | 195                   | 16                | >16               | 267                   | 0.06              | 0.12              |
|                               | Urinary         | 546                   | 1                 | 2                 | 4                 | 8                 | >8                | >8                | 259                   | 16                | >16               | 400                   | 0.06              | 0.12              |
| <i>S. marcescens</i>          | Intra-abdominal | 151                   | 1                 | 2                 | 2                 | 2                 | >8                | >8                | 30                    | 4                 | 4                 | 59                    | 0.06              | 0.12              |
|                               | Respiratory     | 517                   | 1                 | 2                 | 2                 | 2                 | >8                | >8                | 167                   | 4                 | 8                 | 327                   | 0.06              | 0.12              |
|                               | Urinary         | 178                   | 1                 | 2                 | 2                 | 4                 | >8                | >8                | 32                    | 4                 | 16                | 65                    | 0.06              | 0.12              |
| <i>A. baumannii</i>           | Intra-abdominal | 265                   | 0.5               | 1                 | 2                 | 8                 | >8                | >8                | 170                   | 4                 | 16                | 170                   | 64                | >64               |
|                               | Respiratory     | 1,280                 | 0.5               | 1                 | 2                 | 8                 | >8                | >8                | 1,120                 | 2                 | 16                | 1,120                 | 64                | >64               |
|                               | Urinary         | 373                   | 0.25              | 1                 | 2                 | 4                 | >8                | >8                | 305                   | 0.5               | 16                | 305                   | 2                 | >64               |
| <i>S. maltophilia</i>         | Intra-abdominal | 180                   | 1                 | 2                 | 1                 | 4                 | >8                | >8                | 134                   | 0.5               | 2                 | 134                   | >64               | >64               |

|                                  |                 |     |      |      |      |     |    |    |     |     |     |     |      |      |
|----------------------------------|-----------------|-----|------|------|------|-----|----|----|-----|-----|-----|-----|------|------|
|                                  | Respiratory     | 896 | 1    | 2    | 2    | 4   | >8 | >8 | 865 | 0.5 | 2   | 865 | >64  | >64  |
|                                  | Urinary         | 111 | 0.5  | 1    | 1    | 4   | >8 | >8 | 78  | 0.5 | 2   | 78  | >64  | >64  |
| MDR isolates <sup>c</sup>        |                 |     |      |      |      |     |    |    |     |     |     |     |      |      |
| All<br><i>Enterobacteriaceae</i> | Intra-abdominal | 730 | 0.25 | 2    | 1    | 2   | >8 | >8 | 334 | 4   | >16 | 515 | 0.06 | 2    |
|                                  | Respiratory     | 573 | 0.25 | 1    | 0.5  | 2   | >8 | >8 | 373 | 4   | >16 | 545 | 0.06 | 4    |
|                                  | Urinary         | 667 | 0.25 | 1    | 0.5  | 2   | >8 | >8 | 405 | 4   | >16 | 596 | 0.06 | 0.25 |
| <i>Klebsiella</i> spp.           | Intra-abdominal | 248 | 0.5  | 2    | 1    | 4   | >8 | >8 | 113 | 8   | >16 | 158 | 0.06 | >4   |
|                                  | Respiratory     | 257 | 0.25 | 1    | 1    | 2   | 4  | >8 | 173 | 4   | >16 | 242 | 0.06 | >4   |
|                                  | Urinary         | 256 | 0.25 | 2    | 1    | 4   | 8  | >8 | 152 | 4   | >16 | 226 | 0.06 | >4   |
| <i>Enterobacter</i> spp.         | Intra-abdominal | 169 | 0.5  | 2    | 1    | 4   | 4  | >8 | 84  | 4   | >16 | 139 | 0.12 | 0.5  |
|                                  | Respiratory     | 142 | 0.5  | 2    | 1    | 4   | 8  | >8 | 85  | 4   | >16 | 131 | 0.06 | 0.5  |
|                                  | Urinary         | 124 | 0.5  | 2    | 1    | 4   | 4  | >8 | 58  | 8   | >16 | 94  | 0.06 | 0.25 |
| <i>Citrobacter</i> spp.          | Intra-abdominal | 107 | 0.25 | 2    | 0.5  | 2   | 4  | >8 | 57  | 4   | >16 | 91  | 0.06 | 1    |
|                                  | Respiratory     | 48  | 0.25 | 1    | 0.5  | 2   | 2  | >8 | 35  | 8   | >16 | 46  | 0.06 | 2    |
|                                  | Urinary         | 84  | 0.25 | 1    | 0.5  | 2   | 8  | >8 | 47  | 8   | >16 | 73  | 0.06 | 0.25 |
| <i>E. coli</i>                   | Intra-abdominal | 206 | 0.25 | 0.5  | 0.25 | 0.5 | >8 | >8 | 80  | 2   | >16 | 127 | 0.03 | 0.06 |
|                                  | Respiratory     | 126 | 0.12 | 0.25 | 0.25 | 1   | >8 | >8 | 80  | 2   | 16  | 126 | 0.03 | 0.12 |
|                                  | Urinary         | 203 | 0.25 | 0.5  | 0.25 | 1   | >8 | >8 | 148 | 2   | 16  | 203 | 0.03 | 0.06 |
| <i>P. mirabilis</i>              | Intra-abdominal | 85  | 2    | 4    | 4    | 8   | >8 | >8 | 45  | 16  | >16 | 59  | 0.06 | 0.25 |
|                                  | Respiratory     | 75  | 2    | 4    | 4    | 8   | >8 | >8 | 53  | 16  | >16 | 73  | 0.06 | 0.5  |
|                                  | Urinary         | 150 | 2    | 4    | 4    | 8   | >8 | >8 | 69  | >16 | >16 | 109 | 0.06 | 0.12 |
| <i>S. marcescens</i>             | Intra-abdominal | 13  | 2    | 4    | 2    | 4   | >8 | >8 | 2   | --  | --  | 7   | --   | --   |
|                                  | Respiratory     | 45  | 2    | 4    | 2    | 4   | >8 | >8 | 11  | 4   | 16  | 35  | 0.12 | >4   |
|                                  | Urinary         | 23  | 1    | 2    | 2    | 4   | >8 | >8 | 4   | --  | --  | 12  | 0.12 | >4   |
| <i>A. baumannii</i>              | Intra-abdominal | 213 | 0.5  | 1    | 2    | 8   | >8 | >8 | 137 | 8   | 16  | 137 | 64   | >64  |
|                                  | Respiratory     | 951 | 0.5  | 2    | 4    | 8   | >8 | >8 | 828 | 4   | 16  | 828 | 64   | >64  |
|                                  | Urinary         | 205 | 0.5  | 1    | 4    | 8   | >8 | >8 | 162 | 4   | 16  | 162 | 64   | >64  |

<sup>a</sup> No. of organisms tested against eravacycline, tetracycline, tigecycline, and piperacillin-tazobactam, which were all included in the study in 2013-2016.

<sup>b</sup> No. of organisms tested against minocycline (not tested in 2013-2014 and only tested against non-fermentative Gram-negative bacilli in 2015) and meropenem (not tested in 2013-2014).

<sup>c</sup> MDR isolates defined using CLSI breakpoints.

--, MIC<sub>50</sub> and MIC<sub>90</sub> not shown when n<10.

**SUPPLEMENTAL TABLE 3** *In vitro* activity of eravacycline and selected comparator agents against Gram-negative bacilli stratified by study period

| Isolates                      | Study period      | n     | µg/ml             |                   |                   |                   |                   |                   |                   |                   |                   |                   |
|-------------------------------|-------------------|-------|-------------------|-------------------|-------------------|-------------------|-------------------|-------------------|-------------------|-------------------|-------------------|-------------------|
|                               |                   |       | Eravacycline      |                   | Tigecycline       |                   | Tetracycline      |                   | Minocycline       |                   | Meropenem         |                   |
|                               |                   |       | MIC <sub>50</sub> | MIC <sub>90</sub> | MIC <sub>50</sub> | MIC <sub>90</sub> | MIC <sub>50</sub> | MIC <sub>90</sub> | MIC <sub>50</sub> | MIC <sub>90</sub> | MIC <sub>50</sub> | MIC <sub>90</sub> |
| <i>All Enterobacteriaceae</i> | 2013-2014         | 2,997 | 0.25              | 0.5               | 0.5               | 1                 | 2                 | >8                | --                | --                | --                | --                |
|                               | 2015              | 2,475 | 0.25              | 0.5               | 0.5               | 1                 | 2                 | >8                | --                | --                | 0.03              | 0.06              |
|                               | 2016              | 2,299 | 0.25              | 0.5               | 0.5               | 2                 | 1                 | >8                | 2                 | 16                | 0.03              | 0.06              |
|                               | 2017              | 2,643 | 0.25              | 0.5               | 0.5               | 2                 | 1                 | >8                | 2                 | 8                 | 0.03              | 0.12              |
| <i>Klebsiella</i> spp.        | 2013-2014         | 1,493 | 0.25              | 1                 | 0.5               | 1                 | 2                 | 8                 | --                | --                | --                | --                |
|                               | 2015              | 1,148 | 0.25              | 0.5               | 0.5               | 2                 | 2                 | >8                | --                | --                | 0.03              | 0.06              |
|                               | 2016              | 1,057 | 0.25              | 0.5               | 0.5               | 2                 | 1                 | >8                | 2                 | 8                 | 0.03              | 0.06              |
|                               | 2017              | 1,267 | 0.25              | 0.5               | 0.5               | 2                 | 1                 | >8                | 2                 | 8                 | 0.03              | 0.12              |
| <i>Enterobacter</i> spp.      | 2013-2014         | 498   | 0.5               | 1                 | 0.5               | 1                 | 2                 | >8                | --                | --                | --                | --                |
|                               | 2015              | 442   | 0.5               | 0.5               | 1                 | 2                 | 2                 | >8                | --                | --                | 0.06              | 0.12              |
|                               | 2016              | 476   | 0.25              | 0.5               | 0.5               | 2                 | 2                 | >8                | 2                 | 8                 | 0.06              | 0.12              |
|                               | 2017 <sup>a</sup> | 404   | 0.25              | 0.5               | 0.5               | 2                 | 2                 | >8                | 4                 | 8                 | 0.06              | 0.12              |
| <i>Citrobacter</i> spp.       | 2013-2014         | 504   | 0.25              | 0.5               | 0.5               | 0.5               | 1                 | 4                 | --                | --                | --                | --                |
|                               | 2015              | 391   | 0.25              | 0.5               | 0.5               | 2                 | 2                 | >8                | --                | --                | 0.03              | 0.06              |
|                               | 2016              | 380   | 0.12              | 0.5               | 0.25              | 1                 | 1                 | 8                 | 2                 | 8                 | 0.03              | 0.06              |
|                               | 2017              | 501   | 0.25              | 0.5               | 0.5               | 1                 | 1                 | 4                 | 1                 | 8                 | 0.03              | 0.06              |
| <i>E. coli</i>                | 2013-2014         | 502   | 0.12              | 0.25              | 0.25              | 0.5               | 2                 | >8                | --                | --                | --                | --                |
|                               | 2015              | 494   | 0.12              | 0.5               | 0.5               | 0.5               | 2                 | >8                | --                | --                | 0.03              | 0.03              |
|                               | 2016              | 503   | 0.12              | 0.25              | 0.25              | 0.5               | 2                 | >8                | 1                 | 16                | 0.03              | 0.03              |
|                               | 2017              | 471   | 0.12              | 0.25              | 0.25              | 1                 | 2                 | >8                | 1                 | 8                 | 0.015             | 0.03              |
| <i>P. mirabilis</i>           | 2013-2014         | 408   | 1                 | 2                 | 2                 | 4                 | >8                | >8                | --                | --                | --                | --                |
|                               | 2015              | 309   | 2                 | 4                 | 4                 | 8                 | >8                | >8                | --                | --                | 0.06              | 0.12              |
|                               | 2016              | 267   | 1                 | 2                 | 4                 | 8                 | >8                | >8                | 16                | >16               | 0.06              | 0.12              |
|                               | 2017              | 364   | 1                 | 2                 | 4                 | 8                 | >8                | >8                | 16                | >16               | 0.06              | 0.12              |
| <i>S. marcescens</i>          | 2013-2014         | 497   | 1                 | 2                 | 2                 | 2                 | >8                | >8                | --                | --                | --                | --                |
|                               | 2015              | 222   | 1                 | 2                 | 2                 | 4                 | >8                | >8                | --                | --                | 0.06              | 0.12              |
|                               | 2016              | 183   | 1                 | 2                 | 1                 | 2                 | >8                | >8                | 4                 | 8                 | 0.06              | 0.12              |

|                               |                   |     |      |      |      |     |    |    |      |     |      |      |
|-------------------------------|-------------------|-----|------|------|------|-----|----|----|------|-----|------|------|
|                               | 2017              | 46  | 1    | 2    | 2    | 4   | >8 | >8 | 4    | 8   | 0.06 | 0.06 |
| <i>A. baumannii</i>           | 2013-2014         | 499 | 0.5  | 1    | 1    | 4   | >8 | >8 | --   | --  | --   | --   |
|                               | 2015              | 598 | 0.5  | 2    | 2    | 4   | >8 | >8 | 2    | 16  | 32   | >64  |
|                               | 2016              | 503 | 0.5  | 1    | 4    | 8   | >8 | >8 | 2    | 16  | 64   | >64  |
|                               | 2017              | 497 | 0.25 | 1    | 2    | 8   | >8 | >8 | 1    | 16  | 32   | >64  |
| <i>S. maltophilia</i>         | 2013-2014         | 130 | 0.5  | 1    | 0.5  | 2   | >8 | >8 | --   | --  | --   | --   |
|                               | 2015              | 560 | 1    | 2    | 2    | 4   | >8 | >8 | 0.5  | 2   | 64   | >64  |
|                               | 2016              | 469 | 1    | 2    | 2    | 4   | >8 | >8 | 1    | 2   | >64  | >64  |
|                               | 2017              | 51  | 0.5  | 1    | 1    | 2   | >8 | >8 | 0.25 | 1   | >64  | >64  |
| MDR isolates <sup>b</sup>     |                   |     |      |      |      |     |    |    |      |     |      |      |
| All <i>Enterobacteriaceae</i> | 2013-2014         | 395 | 0.5  | 2    | 1    | 2   | >8 | >8 | --   | --  | --   | --   |
|                               | 2015              | 544 | 0.5  | 1    | 1    | 2   | >8 | >8 | --   | --  | 0.06 | 0.25 |
|                               | 2016              | 513 | 0.25 | 1    | 0.5  | 2   | >8 | >8 | 4    | >16 | 0.06 | 1    |
|                               | 2017              | 587 | 0.25 | 1    | 0.5  | 2   | >8 | >8 | 4    | >16 | 0.06 | >4   |
| <i>Klebsiella</i> spp.        | 2013-2014         | 175 | 0.5  | 2    | 1    | 2   | 8  | >8 | --   | --  | --   | --   |
|                               | 2015              | 188 | 0.5  | 2    | 1    | 4   | 4  | >8 | --   | --  | 0.06 | >4   |
|                               | 2016              | 196 | 0.25 | 2    | 1    | 4   | >8 | >8 | 4    | >16 | 0.06 | 4    |
|                               | 2017              | 242 | 0.25 | 1    | 1    | 2   | 8  | >8 | 4    | >16 | 0.06 | >4   |
| <i>Enterobacter</i> spp.      | 2013-2014         | 84  | 0.5  | 4    | 1    | 4   | 8  | >8 | --   | --  | --   | --   |
|                               | 2015              | 137 | 0.5  | 2    | 1    | 4   | 4  | >8 | --   | --  | 0.06 | 0.25 |
|                               | 2016              | 107 | 0.5  | 2    | 1    | 4   | 4  | >8 | 4    | >16 | 0.12 | 0.5  |
|                               | 2017 <sup>a</sup> | 120 | 0.5  | 2    | 1    | 4   | 4  | >8 | 4    | >16 | 0.12 | 2    |
| <i>Citrobacter</i> spp.       | 2013-2014         | 37  | 0.25 | 1    | 0.5  | 2   | 2  | >8 | --   | --  | --   | --   |
|                               | 2015              | 71  | 0.5  | 2    | 1    | 4   | 4  | >8 | --   | --  | 0.06 | 0.25 |
|                               | 2016              | 66  | 0.25 | 1    | 0.5  | 2   | 4  | >8 | 4    | >16 | 0.06 | >4   |
|                               | 2017              | 73  | 0.25 | 1    | 1    | 2   | 8  | >8 | 8    | >16 | 0.06 | 1    |
| <i>E. coli</i>                | 2013-2014         | 99  | 0.25 | 0.5  | 0.25 | 0.5 | >8 | >8 | --   | --  | --   | --   |
|                               | 2015              | 148 | 0.25 | 0.5  | 0.5  | 1   | >8 | >8 | --   | --  | 0.03 | 0.12 |
|                               | 2016              | 156 | 0.12 | 0.25 | 0.25 | 1   | >8 | >8 | 2    | >16 | 0.03 | 0.06 |
|                               | 2017              | 152 | 0.25 | 0.25 | 0.25 | 0.5 | >8 | >8 | 2    | 16  | 0.03 | 0.06 |
| <i>P. mirabilis</i>           | 2013-2014         | 87  | 2    | 4    | 4    | 8   | >8 | >8 | --   | --  | --   | --   |
|                               | 2015              | 74  | 2    | 4    | 8    | 8   | >8 | >8 | --   | --  | 0.06 | 0.12 |

|                      |           |     |     |    |    |    |    |    |     |     |      |      |
|----------------------|-----------|-----|-----|----|----|----|----|----|-----|-----|------|------|
|                      | 2016      | 75  | 1   | 4  | 4  | 8  | >8 | >8 | >16 | >16 | 0.12 | 0.25 |
|                      | 2017      | 92  | 2   | 4  | 4  | 8  | >8 | >8 | 16  | >16 | 0.06 | 0.12 |
| <i>S. marcescens</i> | 2013-2014 | 33  | 2   | 4  | 2  | 4  | >8 | >8 | --  | --  | --   | --   |
|                      | 2015      | 37  | 2   | 2  | 2  | 4  | >8 | >8 | --  | --  | 0.06 | >4   |
|                      | 2016      | 16  | 1   | 4  | 2  | 4  | >8 | >8 | 4   | 16  | 0.12 | >4   |
|                      | 2017      | 1   | --  | -- | -- | -- | -- | -- | --  | --  | --   | --   |
|                      | 2013-2014 | 372 | 0.5 | 1  | 2  | 4  | >8 | >8 | --  | --  | --   | --   |
| <i>A. baumannii</i>  | 2015      | 429 | 1   | 2  | 4  | 8  | >8 | >8 | 4   | 16  | 64   | >64  |
|                      | 2016      | 370 | 0.5 | 1  | 4  | 8  | >8 | >8 | 4   | 16  | 64   | >64  |
|                      | 2017      | 331 | 0.5 | 1  | 4  | 8  | >8 | >8 | 4   | 16  | 64   | >64  |

<sup>a</sup> 2017 *Enterobacter* spp. *E. cloacae* only.

<sup>b</sup> MDR isolates defined using CLSI breakpoints.

--, not tested or n<10.
